# Supplementary material
Source: PubMed Central journal article supplement (PMC8702580)
Supplement: NIHMS1738433-supplement-Supplemental_Material.pdf [file NIHMS1738433-supplement-Supplemental_Material.pdf]

1

Supplementary Tables

Supplemental Table 1. Study Sample Inclusion/Exclusion Criteria

|           | iSTAR                                                                                                                                                                                                                                                                                                                                                                            | STAR 1.0                                                                                                                                                                                                                                                          |
|-----------|----------------------------------------------------------------------------------------------------------------------------------------------------------------------------------------------------------------------------------------------------------------------------------------------------------------------------------------------------------------------------------|-------------------------------------------------------------------------------------------------------------------------------------------------------------------------------------------------------------------------------------------------------------------|
| Inclusion | <ul style="list-style-type: none"> <li>• Discharged from ED for treatment of traumatic injury</li> <li>• Enrollment within ~30 days of injury</li> <li>• Able to complete study measures in English</li> <li>• No MRI contraindications</li> </ul>                                                                                                                               | <ul style="list-style-type: none"> <li>• Admitted for single-incident traumatic injury</li> <li>• Enrollment within 7 days of injury</li> <li>• Experience criterion A event per DSM-5</li> </ul>                                                                 |
| Exclusion | <ul style="list-style-type: none"> <li>• &lt; 18 years or &gt; 60 years old</li> <li>• Spinal cord injury with neurological deficit</li> <li>• Glasgow coma scale &lt; 13</li> <li>• Pregnant planning to become pregnant</li> <li>• On police hold to be released to jail</li> <li>• Comorbid substance abuse</li> <li>• Psychosis</li> <li>• Moderate to severe TBI</li> </ul> | <ul style="list-style-type: none"> <li>• &lt; 18 years of age</li> <li>• Active psychosis</li> <li>• Moderate to severe TBI</li> <li>• Self-inflicted injury</li> <li>• Injuries resulting in inability to communicate</li> <li>• Non-English speaking</li> </ul> |

2

Supplemental Table 2. Study Sample Characteristics

|                                       | iSTAR         | STAR 1.0      |
|---------------------------------------|---------------|---------------|
| <b>Baseline Visit</b>                 | <b>N=215</b>  | <b>N=278</b>  |
| Age (mean/SD)                         | 32.89 / 10.68 | 39.86 / 15.64 |
| Gender (M/F)                          | 103 / 112     | 201 / 77      |
| Race (count/percent of sample)        |               |               |
| American Indian or Alaska Native      |               | 2 (<1%)       |
| Asian                                 | 4 (1%)        |               |
| Black or African American             | 124 (57%)     | 124 (44%)     |
| Hispanic or Latino                    |               | 24 (8%)       |
| White                                 | 58 (27%)      | 128 (46%)     |
| More than one                         | 15 (7%)       |               |
| Unknown or Not Reported               | 13 (6%)       |               |
| Injury type (count/percent of sample) |               |               |
| Motor Vehicle Crash                   | 146 (67%)     | 91 (32%)      |
| Gun Shot                              | 1 (<1%)       | 58 (20%)      |
| Stab                                  | 2 (<1%)       | 29 (10%)      |
| Fall                                  | 6 (2%)        | 47 (16%)      |
| Pedestrian Struck                     | 8 (3%)        | 14 (5%)       |
| Motorcycle crash                      |               | 19 (6%)       |
| Crush Injury                          | 8 (3%)        | 10 (3%)       |
| Recreational Injury                   |               | 4 (1%)        |
| Assault                               | 19 (8%)       | 4 (1%)        |
| Other                                 | 25 (11%)      | 2 (<1%)       |
| Injury Severity Score (mean/SD)       | 0.95 / 2.34   | 10.37 / 6.03  |
| Days since injury (mean/SD)           | 17.7 / 5.7    | 2.62 / 1.80   |
| DASS Depression (mean/SD)             | 9.71 / 10.07  | 4.02 / 4.78   |
| Prior Psychiatric Dx (yes/no)         | 43 / 169      | 79 / 199      |
| <b>6mo Follow-Up</b>                  | <b>N=191</b>  | <b>N=172</b>  |
| Days since injury (mean/SD)           | 183.6 / 12.6  | 191.5 / 21.70 |
| DASS Depression (mean/SD)             | 8.17 / 10.34  | 3.69 / 4.64   |
| CAPS-5                                |               |               |
| Dx (+/-)                              | 42 / 191      | 50 / 172      |
| Total Severity (mean/SD)              | 13.69 / 12.05 | 13.54 / 15.20 |

*Note.* SD, standard deviation; M, male; F, female; DASS, Depression Anxiety Stress Scales; Dx, diagnosis; CAPS-5, Clinician Administered PTSD Scale for DSM-5.

3

4

5
